# Supplementary material for: Cordycepin Isolated from Cordyceps militaris: Its Newly Discovered Herbicidal Property and Potential Plant-Based Novel Alternative to Glyphosate
Source: Molecules. 2019 Aug 9;24(16):2901. doi: 10.3390/molecules24162901 (PMC6720702; doi:10.3390/molecules24162901)
Supplement: Supplementary file 1 [file molecules-24-02901-s001.pdf]

# Cordycepin Isolated from *Cordyceps militaris*: Its newly discovered herbicide property and potential plant-based novel alternative to Glyphosate

Tran Ngoc Quy <sup>1,2</sup>, Tran Dang Xuan <sup>1,\*</sup>, Yusuf Andriana <sup>1</sup>, Hoang-Dung Tran <sup>3</sup>,  
Tran Dang Khanh <sup>4,5</sup> and Rolf Teschke <sup>6</sup>

## SUPPLEMENTARY DATA

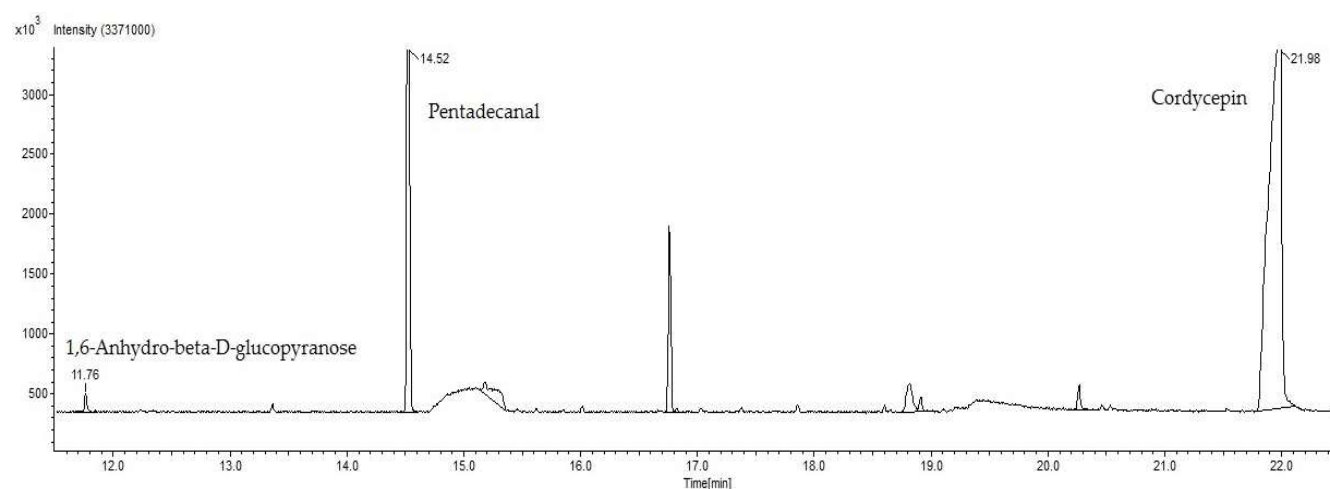

**Figure S1.** GCMS chromatograms of CM4 fraction from EtOAc extract of *Cordyceps militaris*

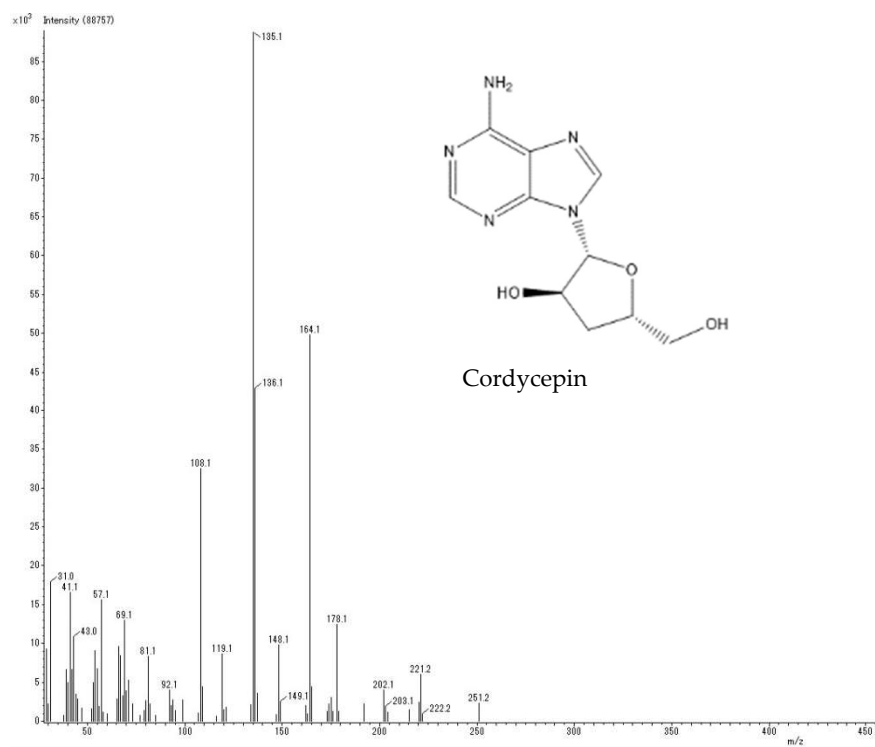

**Figure S2.** Mass spectra of the isolated cordycepin from *Cordyceps militaris* identified by GC-MS

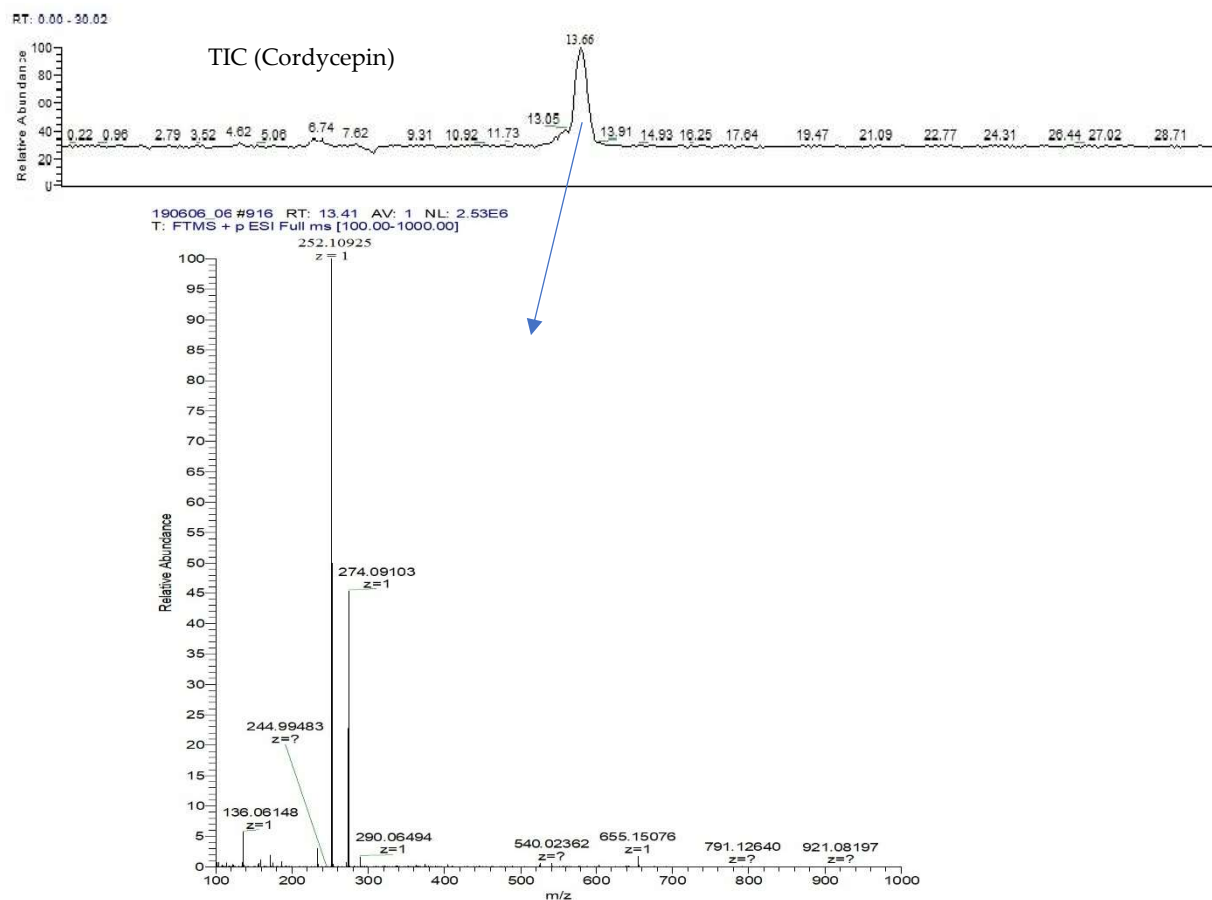

**Figure S3.** Total ion chromatogram and mass spectra of cordycepin identified by LC-ESI-MS
